# Supplementary material
Source: publisher figshare collection journal article supplement (https://acs.figshare.com/ndownloader/files/3972895)
Supplement: Supplementary file 1 [file 3972895]

1 **Supporting Information for the manuscript “Excellent performance**  
2 **of one-pot synthesized Cu-SSZ-13 catalyst for the selective catalytic**  
3 **reduction of NO<sub>x</sub> with NH<sub>3</sub>”**  
4

5 Lijuan Xie<sup>†</sup>, Fudong Liu<sup>†</sup>, Limin Ren<sup>‡</sup>, Xiaoyan Shi<sup>†</sup>, Feng-Shou Xiao<sup>§</sup>, Hong He<sup>\*†</sup>

6 <sup>†</sup>Research Center for Eco-Environmental Sciences, Chinese Academy of Sciences,  
7 Beijing 100085, China

8 <sup>‡</sup>College of Chemistry and State Key Laboratory of Inorganic Synthesis and  
9 Preparative Chemistry, Jilin University, Changchun 130012, China

10 <sup>§</sup>Department of Chemistry, Zhejiang University, Hangzhou 310028, China

11 <sup>\*</sup>Corresponding author.

12 Fax: +86 10 62849123; Tel: +86 10 62849123;

13 E-mail: [honghe@rcees.ac.cn](mailto:honghe@rcees.ac.cn)

14 Number of Pages: 6

15 Number of Tables: 1

16 Number of Figures: 6

17  
18 **1. NH<sub>3</sub>-SCR performance of Cu<sub>3,8</sub>-SSZ-13 in the high temperature range**

19 **Table S1 NH<sub>3</sub>-SCR performance of Cu<sub>3,8</sub>-SSZ-13 in the high temperature range.**

|                                | Temperature (°C) |      |      |
|--------------------------------|------------------|------|------|
|                                | 600              | 650  | 700  |
| NO <sub>x</sub> conversion (%) | 86.3             | 74.8 | 52.6 |
| N <sub>2</sub> selectivity (%) | 99.2             | 98.9 | 99.3 |

20 It was observed that deNO<sub>x</sub> catalytic activity of the catalyst decreased with the

1 increase of reaction temperature. However,  $\text{NO}_x$  conversion exceeding 70% was  
2 achieved with GHSV at  $400,000 \text{ h}^{-1}$  at temperatures lower than  $650 \text{ }^\circ\text{C}$ . In addition,  
3 excellent  $\text{N}_2$  selectivity (nearly 100%) was kept even the temperature was as high as  
4  $700 \text{ }^\circ\text{C}$ . The results indicated that the catalyst could also maintain good  $\text{NH}_3$ -SCR  
5 performance in such high temperature range.

## 6 2. The effect of $\text{C}_3\text{H}_6$ on $\text{NH}_3$ -SCR reaction for $\text{Cu}_{3.8}$ -SSZ-13 catalyst

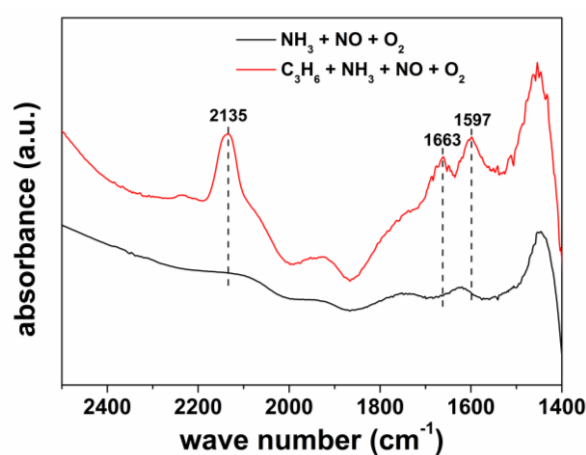

7

8 **Figure S1. Comparison of species adsorbed on catalyst surface with different feed gas at 300**  
9  **$^\circ\text{C}$ .**

10 The *in situ* DRIFTS experiments were carried out to confirm the effect of  $\text{C}_3\text{H}_6$  at  
11  $300 \text{ }^\circ\text{C}$ . In “standard SCR” condition, few species were recorded on catalyst surface.  
12 However, much species deserved in the presence of  $\text{C}_3\text{H}_6$ . The peaks of 1597 and  
13  $1663 \text{ cm}^{-1}$  could be assigned to carboxylate and acrolein, respectively [1-2]. Both of  
14 them should be caused by the oxidation of  $\text{C}_3\text{H}_6$ . The peak of  $2135 \text{ cm}^{-1}$  was assigned  
15 to  $\text{CO-Cu}^+$  aroused from the reaction between  $-\text{NCO}$  and  $\text{NO}$ , meaning some  $\text{Cu}$   
16 species were occupied and could not participate in  $\text{NH}_3$ -SCR reaction [1,3]. The  
17 above three species were all related to the partial oxidation of  $\text{C}_3\text{H}_6$  strongly. Thus,  
18  $\text{C}_3\text{H}_6$  partial oxidation poisoned the catalysts severely around  $300 \text{ }^\circ\text{C}$ .

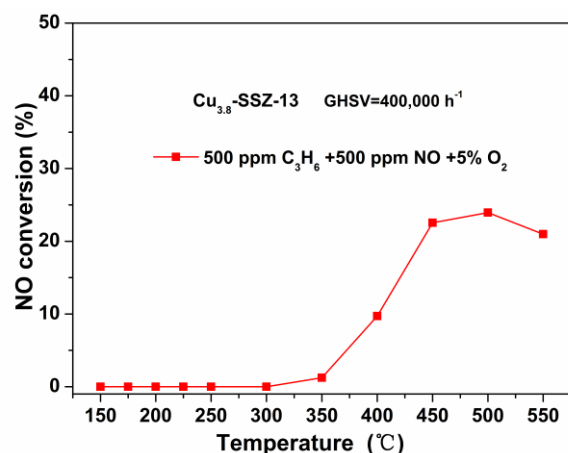

1

2 **Figure S2. C<sub>3</sub>H<sub>6</sub>-SCR activity of Cu<sub>3.8</sub>-SSZ-13 catalyst. Reaction conditions: [NO] = [C<sub>3</sub>H<sub>6</sub>] =**  
 3 **500 ppm, [O<sub>2</sub>] = 5 vol.%, N<sub>2</sub> balance and GHSV = 400,000 h<sup>-1</sup>.**

4 As shown in Figure S2, the NO<sub>x</sub> conversion was relatively low over Cu<sub>3.8</sub>-SSZ-13  
 5 when C<sub>3</sub>H<sub>6</sub> was used as reducing agent. NO<sub>x</sub> was converted obviously when  
 6 temperature was higher than 300 °C. The phenomenon was consistent with the results  
 7 that the NH<sub>3</sub>-SCR activity increased in the high temperature range in the presence of  
 8 C<sub>3</sub>H<sub>6</sub> (> 300 °C).

9 3. XRD profile of aged Cu<sub>3.8</sub>-SSZ-13 catalyst

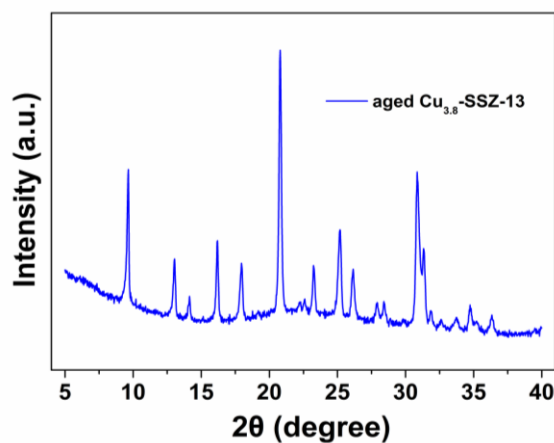

10

11 **Figure S3. XRD profile of aged Cu<sub>3.8</sub>-SSZ-13 catalyst.**

12 The catalyst still maintained zeolite structure after severe hydrothermal aging  
 13 treatment even a few amount of amorphous phase appeared.

14

1 4. <sup>27</sup>Al NMR profiles of fresh and aged Cu<sub>3.8</sub>-SSZ-13 catalyst

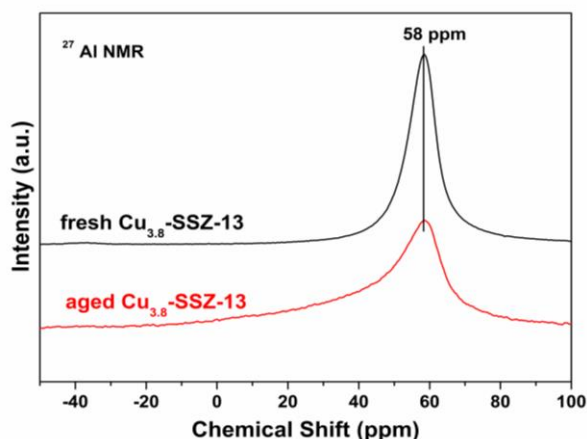

2

3 **Figure S4.** <sup>27</sup>Al NMR profile of fresh and aged Cu<sub>3.8</sub>-SSZ-13 catalyst.

4 Solid state <sup>27</sup>Al MAS NMR spectra were collected on a Bruker AVANCE III  
5 400MHz WB Solide-State NMR spectrometer with operating at the spectral frequency  
6 of 104.29 MHz. A relaxation delay 1 s was applied to collect single pulse spectra. All  
7 measurements were performed at room temperature, and Al(NO<sub>3</sub>)<sub>3</sub> were used as  
8 external references, respectively. The <sup>27</sup>Al NMR results of Cu<sub>3.8</sub>-SSZ-13 catalyst  
9 before and after hydrothermal treatment were shown below.

10 The chemical shift of 58 ppm was resulted by the Al atom in the framework, which  
11 has a 4-fold coordination (Al<sup>IV</sup>). However, if Al atom was removed from the zeolite  
12 framework, the atom can be located outside the lattice, showing a 6-fold-type  
13 coordination (Al<sup>VI</sup>) with much lower chemical shift in <sup>27</sup>Al NMR spectra [4].  
14 Compared with fresh Cu<sub>3.8</sub>-SSZ-13 catalyst, the intensity area of Al<sup>IV</sup> in the aged  
15 sample decreased greatly, and a broad peak at *ca.* 15 ppm appeared. The results  
16 indicated that dealumination occurred during the hydrothermal treatment.

1 5. H<sub>2</sub>-TPR profile of H-SSZ-13

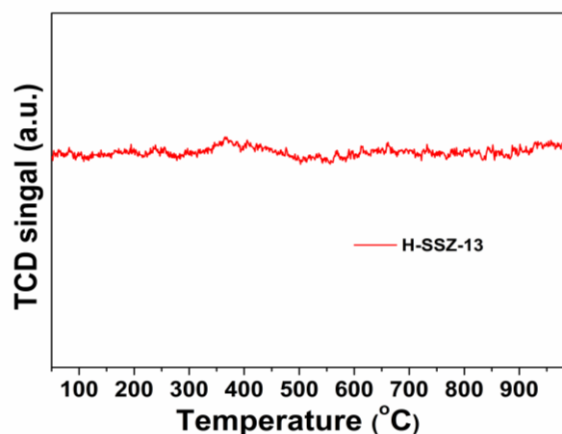

2

3

**Figure S5. H<sub>2</sub>-TPR profile of H-SSZ-13.**

4

There was no H<sub>2</sub> consumption for H-SSZ-13 sample.

5

6. NH<sub>3</sub>-SCR performance of aged Cu<sub>3,6</sub>-SSZ-13 catalyst

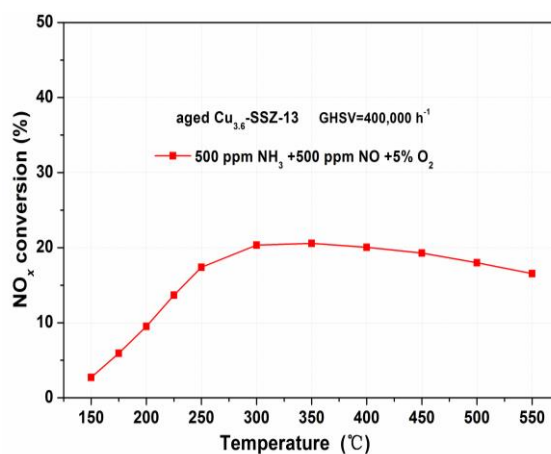

6

7

**Figure S6. NH<sub>3</sub>-SCR performance of aged Cu<sub>3,6</sub>-SSZ-13 catalyst.**

8

After hydrothermal aging at 750 °C for 16 h, the aged Cu<sub>3,6</sub>-SSZ-13 sample showed

9

poor NH<sub>3</sub>-SCR performance. The highest NO<sub>x</sub> conversion was only *ca.* 20%. Thus,

10

Cu<sub>3,6</sub>-SSZ-13 catalyst showed much lower hydrothermal stability.

11

1 **References**

- 2 1. Heo, I.; Lee, Y.; Nam, I.-S.; Choung, J. W.; Lee, J.-H.; Kim, H.-J., Effect of  
3 hydrocarbon slip on NO removal activity of CuZSM5, FeZSM5 and V<sub>2</sub>O<sub>5</sub>/TiO<sub>2</sub>  
4 catalysts by NH<sub>3</sub>. *Micropor. Mesopor. Mater.* **2011**, *141*, (1-3), 8-15.
- 5 2. Li, J.; Zhu R.; Cheng, Y.; Lambert, C. K.; Yang, R. T., Mechanism of propene  
6 poisoning on Fe-ZSM-5 for selective catalytic reduction of NO<sub>x</sub> with ammonia.  
7 *Environ. Sci. Technol.* **2010**, *44*, 1799-1805.
- 8 3. Kwak, J. H.; Zhu, H.; Lee, J. H.; Peden, C. H. F.; Szanyi, J., Two different cation  
9 positions in Cu-SSZ-13? *Chem. Commun.* **2012**, *48*, 4758-4760.
- 10 4. Schmieg, S. J.; Oh, S. H.; Kim, C. H. Brown, D. B.; Lee, J. H.; Peden, C. H. F.;  
11 Kim, D. H., Thermal durability of Cu-CHA NH<sub>3</sub>-SCR catalysts for diesel NO<sub>x</sub>  
12 reduction. *Catal. Today.* **2011**, *184*, (1), 252-261.
